# Supplementary material for: Biallelic C1QBP Mutations Cause Severe Neonatal-, Childhood-, or Later-Onset Cardiomyopathy Associated with Combined Respiratory-Chain Deficiencies
Source: PubMed Central journal article supplement (PMC5630164; doi:10.1016/j.ajhg.2017.08.015), 2017-09-21
Supplement: mmc1.pdf [file mmc1.pdf]

**Supplemental Data**

**Biallelic *C1QBP* Mutations Cause Severe Neonatal-,  
Childhood-, or Later-Onset Cardiomyopathy Associated  
with Combined Respiratory-Chain Deficiencies**

**René G. Feichtinger, Monika Oláhová, Yoshihito Kishita, Caterina Garone, Laura S. Kremer, Mikako Yagi, Takeshi Uchiumi, Alexis A. Jourdain, Kyle Thompson, Aaron R. D'Souza, Robert Kopajtich, Charlotte L. Alston, Johannes Koch, Wolfgang Sperl, Elisa Mastantuono, Tim M. Strom, Saskia B. Wortmann, Thomas Meitinger, Germaine Pierre, Patrick F. Chinnery, Zofia M. Chrzanowska-Lightowlers, Robert N. Lightowlers, Salvatore DiMauro, Sarah E. Calvo, Vamsi K. Mootha, Maurizio Moggio, Monica Sciacco, Giacomo P. Comi, Dario Ronchi, Kei Murayama, Akira Ohtake, Pedro Rebelo-Guiomar, Masakazu Kohda, Dongchon Kang, Johannes A. Mayr, Robert W. Taylor, Yasushi Okazaki, Michal Minczuk, and Holger Prokisch**

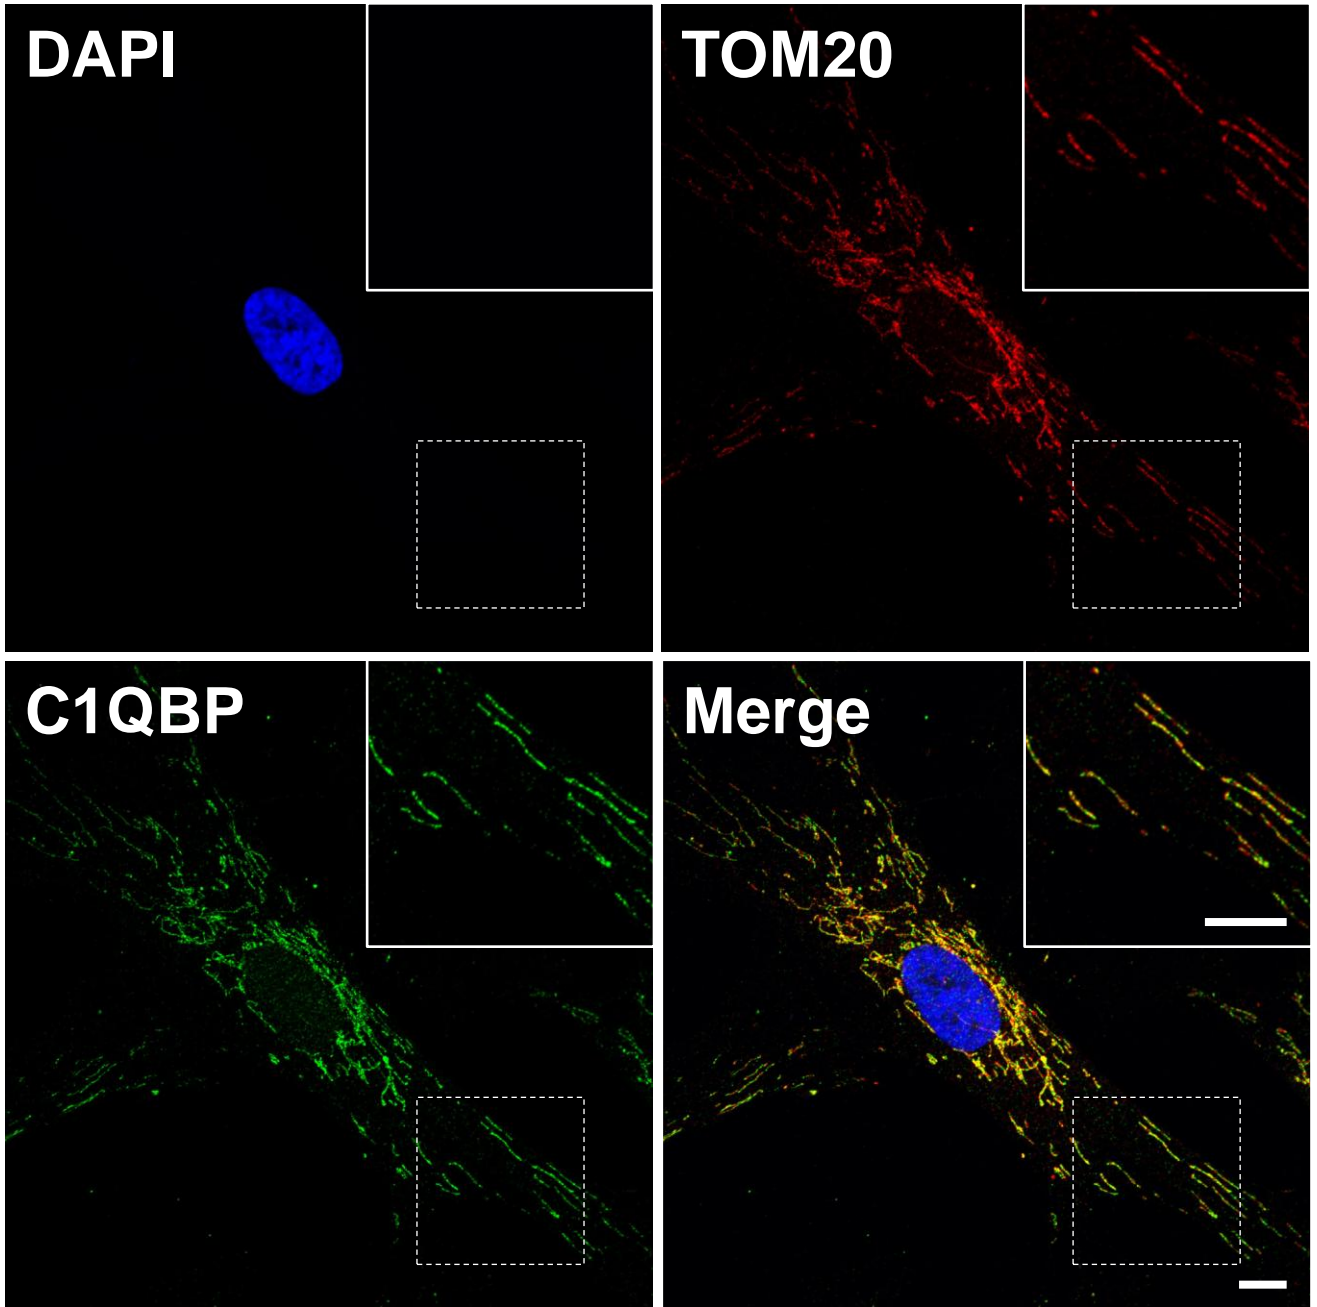

**Figure S1.** Immunofluorescence analysis of C1QBP localisation in human primary fibroblasts. C1QBP was detected using an antibody to the endogenous protein (green). Mitochondria were detected using anti-TOM20 (red). Nuclei were stained with DAPI (blue). Images were digitally overlaid, with co-localisation of C1QBP with mitochondria appearing in yellow. Insets are magnified views of sections indicated by dashed line. Scale bars: 10  $\mu\text{m}$ .

**Table S1. Predicted consequence of *CIQBP* variants**

|                               | <b>P1-Allele 1</b>     | <b>P1-Allele 2</b>    | <b>P2-Allele 1</b> | <b>P2-Allele 2</b> | <b>P3-Allele 1+2</b> | <b>P4-Allele 1+2</b>        |
|-------------------------------|------------------------|-----------------------|--------------------|--------------------|----------------------|-----------------------------|
| Mutation, cDNA (NM_001212.3)  | c.557G>C               | c.612C>G              | c.739G>T           | c.824T>C           | c.823C>T             | c.562_564delTAT             |
| Protein (NP_001203.1)         | p.Cys186Ser            | p.Phe204Leu           | p.Gly247Trp        | p.Leu275Pro        | p.Leu275Phe          | p.Tyr188del                 |
| Mutation, genomic (hg19)      | chr17:5337008C>G       | chr17:5336700G>C      | chr17:5336445C>A   | chr17:5336360A>G   | chr17:5336361G>A     | chr17:5337001_5337003delATA |
| Exon                          | 4                      | 5                     | 6                  | 6                  | 6                    | 4                           |
| ExAC frequency                | 0.000008237 (1/121404) | 0.00003296 (4/121360) | 0                  | 0                  | 0                    | 0.000008238 (1/121390)      |
| 1000 genome frequency         | 0                      | 0                     | 0                  | 0                  | 0                    | 0                           |
| PolypPhen-2 prediction        | probably damaging      | possibly damaging     | probably damaging  | probably damaging  | probably damaging    | NA                          |
| PolypPhen-2 score (max. 1)    | 1                      | 0.922                 | 1                  | 1                  | 0.98                 | NA                          |
| MutationTaster prediction     | disease causing        | disease causing       | disease causing    | disease causing    | disease causing      | disease causing             |
| MutationTaster score          | 0.99999999012031       | 0.999996883643345     | 0.99999999997996   | 0.9999999999998    | 0.99999994658642     | 0.9999999728738             |
| SIFT prediction               | Damaging               | Damaging              | Damaging           | Damaging           | Damaging             | NA                          |
| SIFT score (cutoff <0.050)    | 0.000                  | 0.000                 | 0.000              | 0.001              | 0.004                | NA                          |
| Provean prediction            | Deleterious            | Deleterious           | Deleterious        | Deleterious        | Deleterious          | Deleterious                 |
| Provean score (cutoff <-2.50) | -8.67                  | -5.96                 | -7.58              | -6.29              | -3.49                | -9.61                       |

PolyPhen-2 <http://genetics.bwh.harvard.edu/pph2/bgi.shtml>  
 MutationTaster <http://www.mutationtaster.org>  
 SIFT, Provean [http://provean.jcvi.org/genome\\_submit\\_2.php?species=human](http://provean.jcvi.org/genome_submit_2.php?species=human)

**Table S2. Biochemical Findings in Individuals with *CIQP* mutations**

| S# | Tissue      | Histology                                                           | Histochemistry                                     | Normalized Mitochondrial Respiratory Chain Activity                                                                                                                                                                                                                                                                                                              | Aberrant Activity in %                                                                                                     | Molecular Genetics (mtDNA) |                  |
|----|-------------|---------------------------------------------------------------------|----------------------------------------------------|------------------------------------------------------------------------------------------------------------------------------------------------------------------------------------------------------------------------------------------------------------------------------------------------------------------------------------------------------------------|----------------------------------------------------------------------------------------------------------------------------|----------------------------|------------------|
|    |             |                                                                     |                                                    |                                                                                                                                                                                                                                                                                                                                                                  |                                                                                                                            | Multiple mtDNA deletions   | mtDNAcopy number |
| S1 | Muscle      | NA                                                                  | RRF<br>COX-deficient fibers (~75% of total biopsy) | I/CS, ( <b>0.028</b> ; n.v.0.104±0.036)<br>II/CS ( <b>0.093</b> ; n.v.0.145±0.047)<br>III/CS ( <b>0.044</b> ; n.v. 0.554±0.345)<br>IV/CS ( <b>0.102</b> ; n.v. 0.124±0.511)                                                                                                                                                                                      | I/CS: 27%<br>II/CS: 64%<br>III/CS: 8%<br>IV/CS: 82%                                                                        | -                          | 250%             |
| S2 | Liver       | Lipid droplets                                                      | NA                                                 | I/CS ( <b>0.0367</b> ; n.r. 0.62-0.71)<br>II/CS ( <b>0.96</b> ; n.r. 2.69-2.74)<br>III/CS ( <b>0.069</b> ; n.r. 0.31-0.63)<br>IV/CS ( <b>0.0024</b> ; n.r.0.019-0.028)<br>CS/mg protein (38.6, n.r. 27.9-49.8)                                                                                                                                                   | I/CS: 6%<br>II/CS: 36%<br>III/CS: 22%<br>IV/CS: 13%<br>CS/mg protein: 138%                                                 | -                          | 599%             |
|    | Fibroblasts | NA                                                                  | NA                                                 | I/CS (0.323; n.r. 0.267-0.792)<br>II/CS (0.311; n.r. 0.287-0.875)<br>III/CS (0.066; n.r. 0.058-0.28)<br>IV/CS ( <b>0.011</b> ; n.r. 0.014-0.064)<br>CS/mg protein ( <b>312.6</b> ; n.r. 82.4-139)                                                                                                                                                                | I/CS: nrl<br>II/CS: nrl<br>III/CS: nrl<br>IV/CS: 79%<br>CS/mg protein: 379%                                                | -                          | NA               |
| S3 | Muscle      | NA                                                                  | RRF<br>COX-deficient fibers                        | I/CS ( <b>0.02</b> ; n.r.0.17-0.31)<br>I+III/CS ( <b>0.15</b> ; n.r.0.24-0.81)<br>III/CS ( <b>0.17</b> ; n.r. 2.12-3.09)<br>IV/CS ( <b>0.15</b> ; n.r. 2.59-3.12)<br>CS/mg protein ( <b>511</b> ; n.r. 150-325)                                                                                                                                                  | I/CS: 12%<br>I+III/CS: 63%<br>III/CS: 8%<br>IV/CS: 6%<br>CS/mg protein: 341%                                               | + (long range)             | nrl              |
|    | Fibroblasts | NA                                                                  | NA                                                 | I/CS (0,08; 0,06; n.r. 0,05-0,09)<br>I+III/CS ( <b>0,2</b> ; 0,48; n.r. 0,24-0,58)<br>II/CS (0,43; 0,48; n.r. 0,37-0,48)<br>II+III/CS (0,67; 0,66; n.r. 0,39-0,72)<br>III/CS (1,21; 1,23; n.r. 1,17-1,99)<br>IV/CS ( <b>1,22</b> ; <b>1,25</b> ; n.r. 1,30-1,68)<br>V/CS (0,24; <b>0,42</b> ; n.r. 0,15-0,39)<br>CS/mg protein ( <b>207</b> ; 442; n.r. 242-590) | I/CS: nrl<br>I+III/CS: nrl<br>II/CS: nrl<br>II+III/CS: nrl<br>III/CS: nrl<br>IV/CS: 95%<br>V/CS: nrl<br>CS/mg protein: nrl | NA                         | NA               |
| S4 | Muscle      | Fiber size variability, central nuclei, increased connective tissue | Isolated COX-deficient fibers                      | I/CS ( <b>0.06</b> ; n.v. 0.11±0.03)<br>I+III/CS ( <b>0.14</b> ; n.v. 0.27±0.05)<br>II/CS ( <b>0.04</b> ; n.v. 0.07±0.01)<br>II+III/CS ( <b>0.03</b> ; 0.09±0.02)<br>IV/CS ( <b>0.16</b> ; 0.35±0.04)<br>CS/mg protein ( <b>151.7</b> ; n.v. 137.3±15)                                                                                                           | I/CS: 55%<br>I+III/CS: 52%<br>II/CS: 57%<br>II+III/CS: 33%<br>IV/CS: 46%<br>CS/mg protein: 111%                            | + (Southern Blot)          | nrl              |

S#=subject number; NA= not available, RRF= ragged red fibers; I= NADH dehydrogenase; II= succinate dehydrogenase; III= CoQH<sub>2</sub>-cytochrome c reductase; IV= cytochrome c oxidase; CS= citrate synthase; mg= milligram; nrl= normal; -=absent; += present; COX= cytochrome c oxidase; n.r. = normal range; n.v. = normal values (mean ± standard deviation (SD)). The percent were either calculated as percent of the lower range value or percent of the mean. Reported values are marked in bold. Depending on the method and sample preparation used, the range of control values can vary by an order of magnitude between different metabolic laboratories. (Gellerich, F.N., Mayr, J.A., Reuter, S., Sperl, W., and Zier, S. (2004). The problem of interlab variation in methods for mitochondrial disease diagnosis: enzymatic measurement of respiratory chain complexes. Mitochondrion 4, 427-439.)
